# Supplementary material for: The Role of Fractalkine in the Regulation of Endometrial Iron Metabolism in Iron Deficiency
Source: MDPI journal article supplement (doi:10.3390/ijms24129917), 2023-06-08
Supplement: s1 [file s1]

# The Role of Fractalkine in the Regulation of Endometrial Iron Metabolism at Iron Deficiency

Edina Pandur <sup>1,2,\*</sup>, Ramóna Pap <sup>1,2</sup>, Gergely Jánosa <sup>1</sup>, Adrienn Horváth <sup>1</sup> and Katalin Sipos <sup>1,2</sup>

<sup>1</sup> Department of Pharmaceutical Biology, Faculty of Pharmacy, University of Pécs, H-7624 Pécs, Hungary; pap.ramona@pte.hu (R.P.); janosa.gergely@gytk.pte.hu (G.J.); adrienn.horvath2@gytk.pte.hu (A.H.); katalin.sipos@aok.pte.hu (K.S.)

<sup>2</sup> National Laboratory on Human Reproduction; University of Pécs, H-7624 Pécs, Hungary

\* Correspondence: edina.pandur@aok.pte.hu

Figure 3A

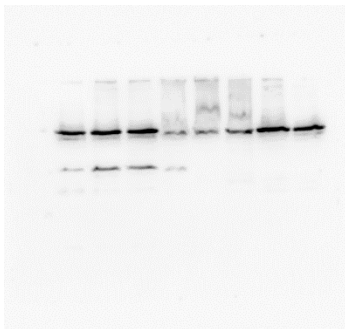

DMT-1

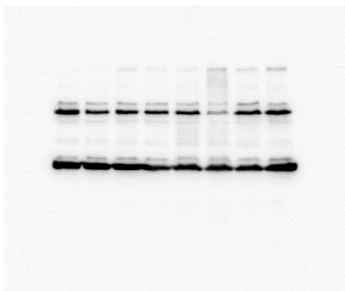

FP (up), GAPDH (down)

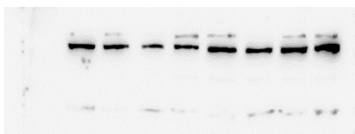

TfR1 (up)

Figure 4A

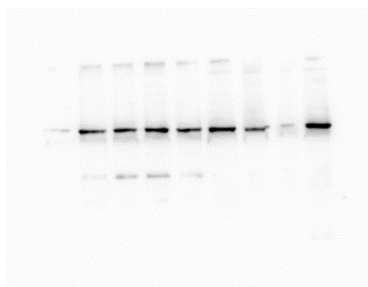

DMT-1

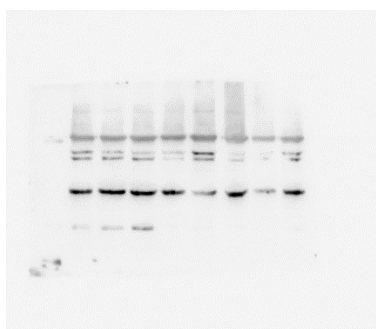

FP (down)

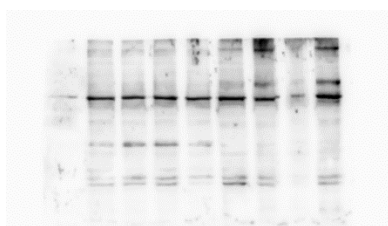

Tfr1

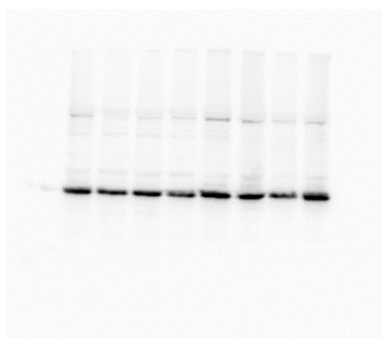

GAPDH

Figure 6A

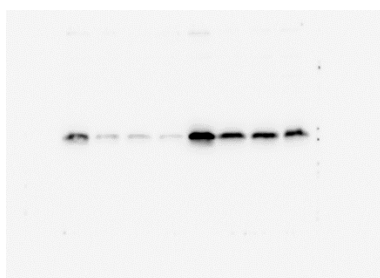

FTH

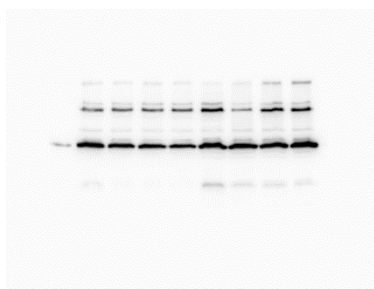

GAPDH

Figure 6C

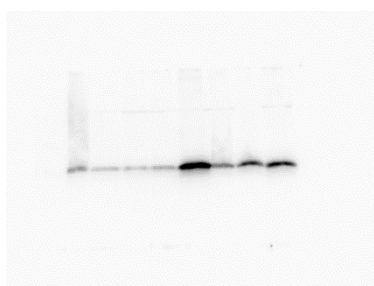

FTH

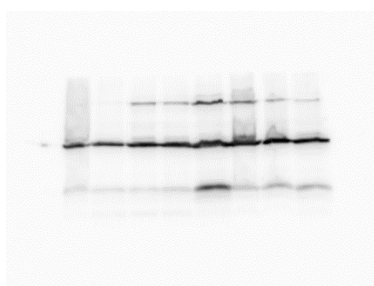

GAPDH

Figure 8A

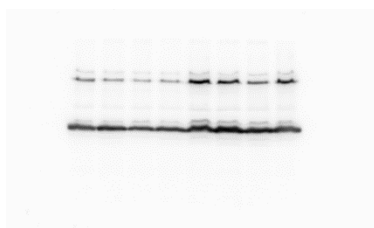

FECH (up), GAPDH (down)

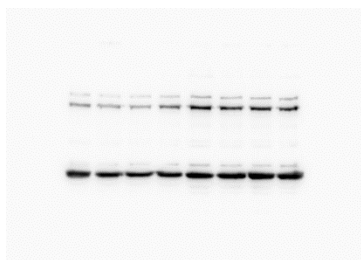

GAPDH (down)

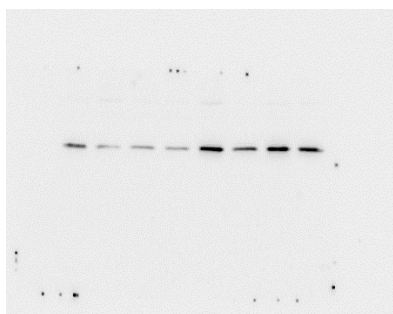

HO-1

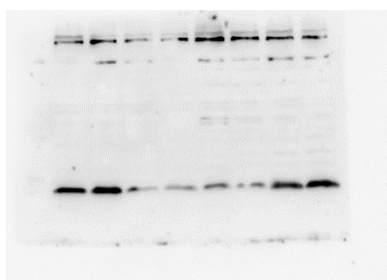

Mfrn-1

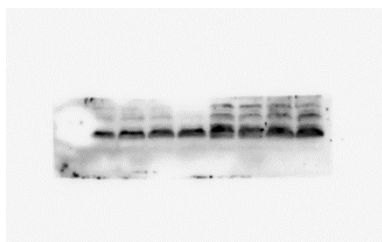

Mfrn-2

Figure 9A

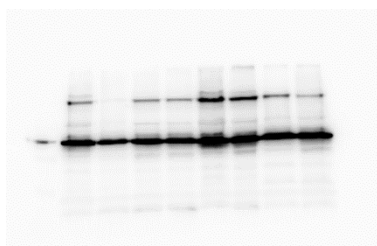

FECH (up), GAPDH (down)

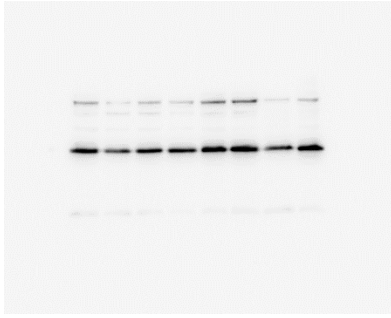

GAPDH

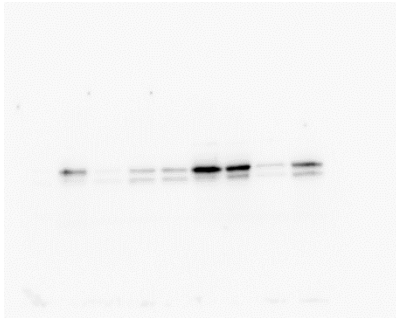

HO-1

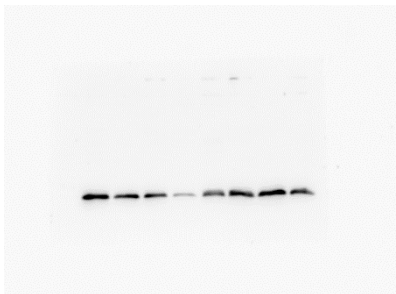

Mfrn-1

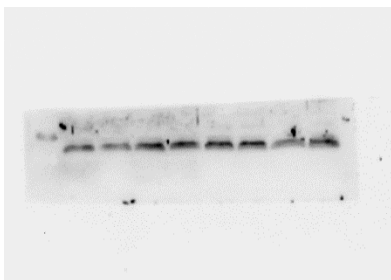

Mfrn-2

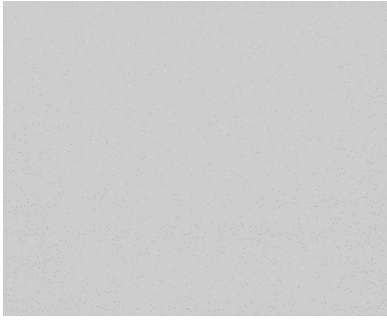

Negative Ctrl DMT-1

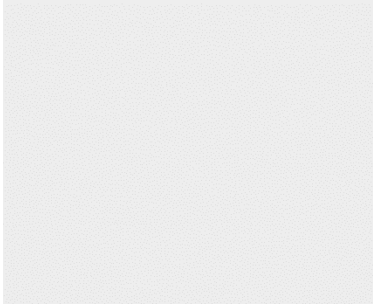

Negative Ctrl TfR1

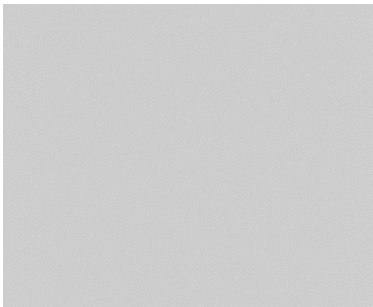

Negative Ctrl FP

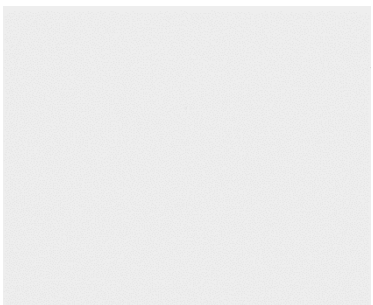

Negative Ctrl FECH

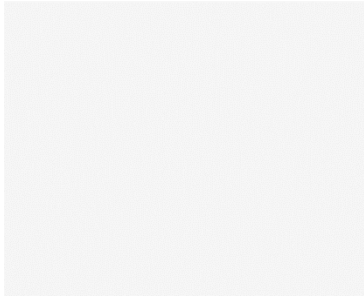

Negative Ctrl Mfrn-1

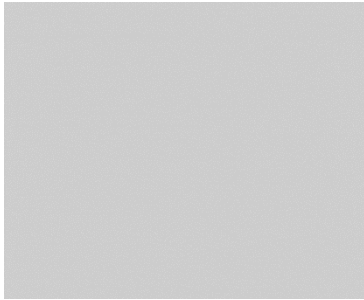

Negative Ctrl Mfrn-2

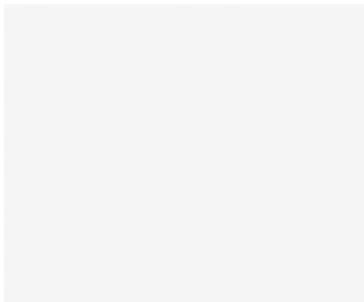

Negative Ctrl HO-1

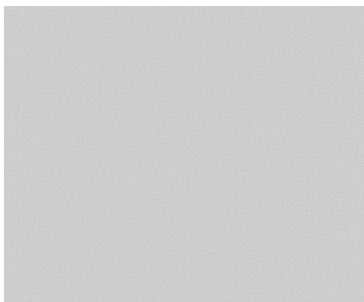

Negative Ctrl FTH

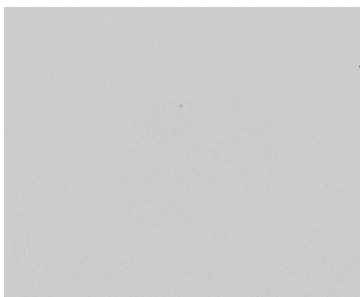

Negative Ctrl GAPDH

**Supplementary Figure S1.** Original, full-length Western blot images and negative controls (only secondary antibody). The images were taken with a UVItec Alliance Q9 Advanced imaging system using WesternBright ECL chemiluminescent substrate. The negative Ctrls were exposed to light for the same time as in the case of the original WBs.

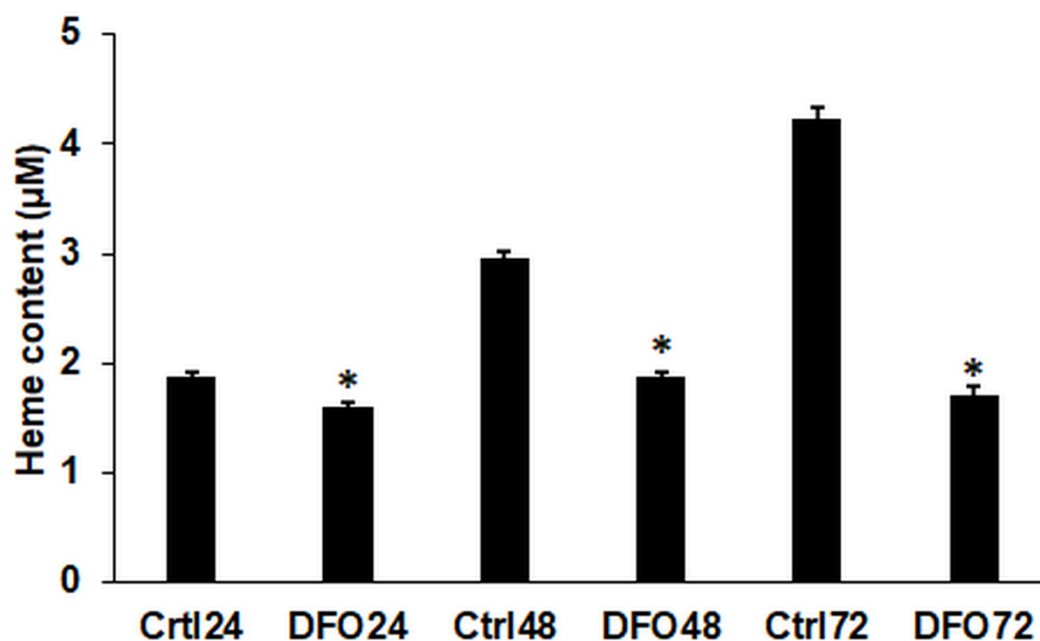

**Supplementary Figure S2.** Heme concentration measurement in DFO-treated HEC-1A cells. The treatments were carried out in a serum-free environment for 24 h, 48 h, and 72 h. Heme concentration measurements were carried out by a Heme Assay Kit. The measurements were carried out in triplicate in three independent experiments. The columns represent the mean ± SD of three independent experiments (n=3). The asterisk shows p<0.05 compared to the control. Abbreviation: DFO-desferrioxamine.
